# Supplementary material
Source: PubMed Central journal article supplement (PMC6129119)
Supplement: jciinsight-3-121510-s208.pdf [file jciinsight-3-121510-s208.pdf]

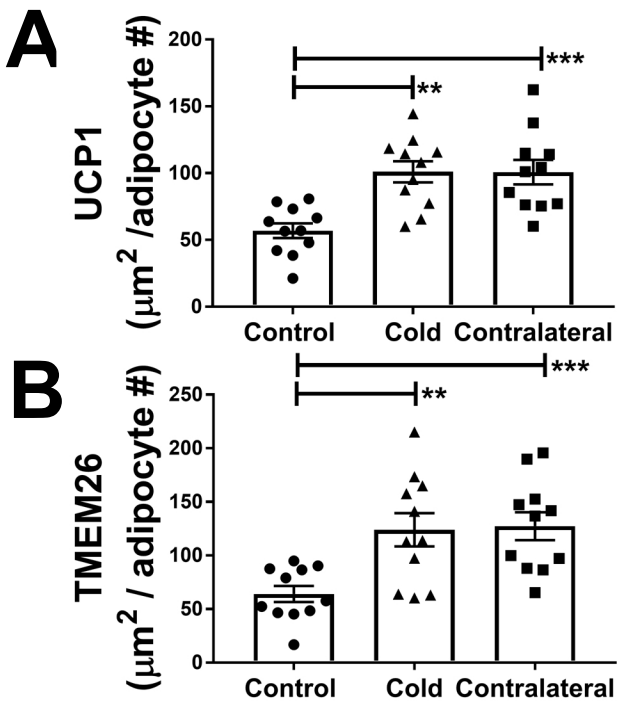

**Figure S1. Repeated cold exposure induces uncoupling protein 1 (UCP1) and transmembrane protein 26 (TMEM26) in human abdomen subcutaneous white adipose tissue (SC WAT).** An ice pack was applied to the abdomen for 30 min each day for 10 consecutive days. SC WAT was isolated and subjected UCP1 and TMEM26 immunohistochemistry as described in Methods. A and B) UCP1 and TMEM26 expression was determined as described in Methods. The data are expressed as area of UCP1 (A) or TMEM26 (B) staining ( $\mu\text{m}^2$ ) per adipocyte number. The data were analyzed by a repeated measures MANOVA as described in Methods. Data represent means  $\pm$  SEM (n=11); \*\*P<0.01; \*\*\*P<0.001.

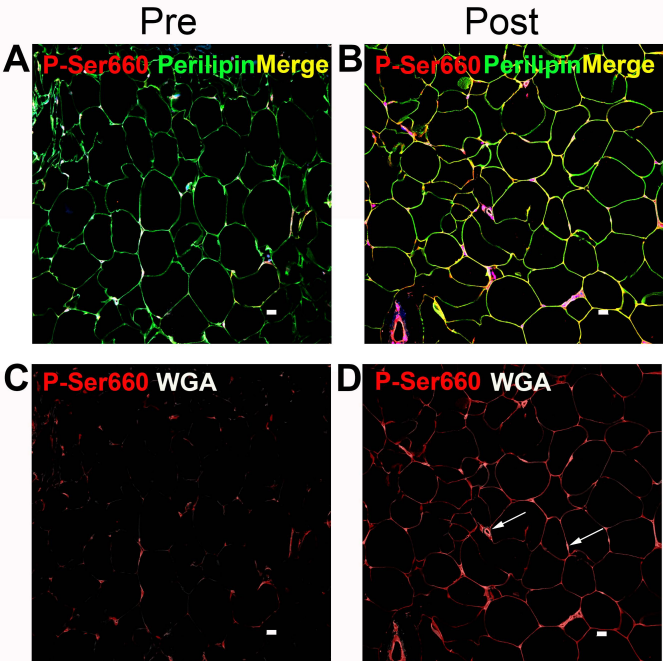

**Figure S2. Phospho hormone sensitive lipase (HSL) serine<sup>660</sup> (P-Ser660) staining colocalizes with perilipin and endothelial cells.** An overlay of phospho-HSL serine<sup>660</sup> staining (red) from Figure 8 with perilipin (green) and wheat germ agglutinin (WGA; white) is shown (scale bar: 10  $\mu$ m). A and B) phospho-HSL serine<sup>660</sup> and perilipin (yellow indicates overlapping staining). C and D) An overlay of phospho-HSL serine<sup>660</sup> staining (red) with WGA (white) from A and B is shown. Arrows point to examples of overlap of phospho-HSL serine<sup>660</sup> staining with endothelial cells in capillaries.

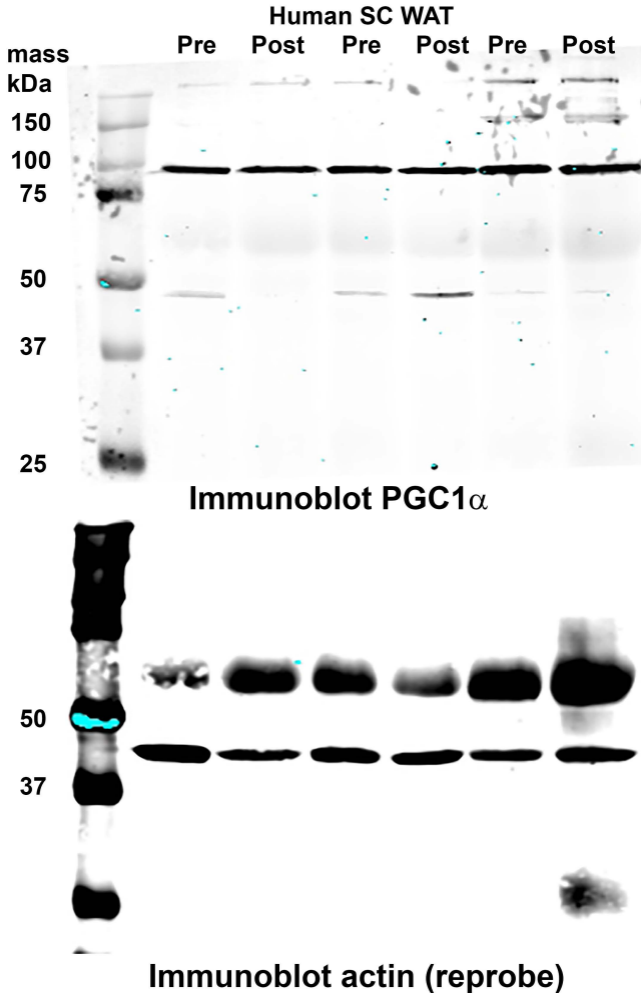

**Immunoblot actin (reprobe)**

**Figure S3. Uncropped immunoblots of peroxisome proliferator-activated receptor gamma co-activator 1-alpha (PGC1 $\alpha$ ) and actin.** The uncropped immunoblots of human subcutaneous white adipose tissue before and after mirabegron treatment from the Figure 8E inset are shown. Reprobing with actin antibody resulted in a non specific band and a band at 45 KDa, the correct molecular mass of actin.

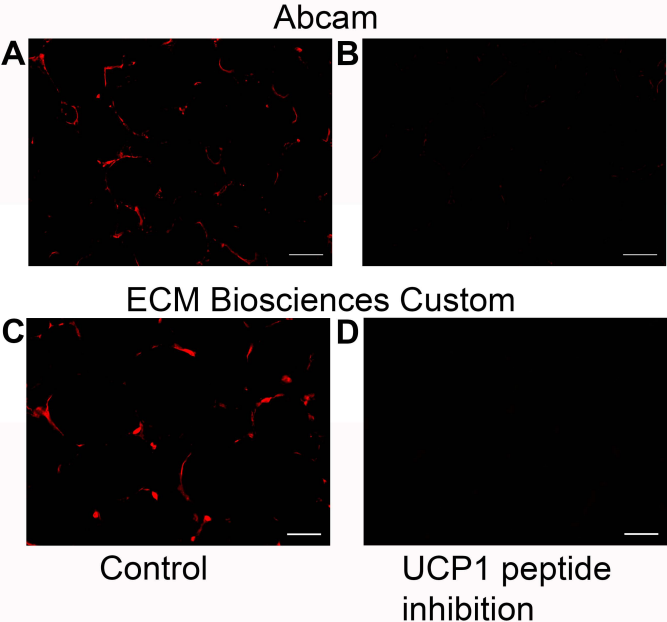

**Figure S4. The reactivity of the Abcam and ECM biosciences uncoupling protein 1 (UCP1) antibodies is inhibited by UCP1 peptide.** Thigh subcutaneous white adipose tissue from the cold treated leg of a lean research participant was stained with the indicated antibody with and without pre incubation with free UCP1 peptide (scale bar: 50  $\mu$ m).
